# Supplementary material for: Nanoscale heterogeneities in CeO2–ZrO2 nanocrystals highlighted by UV-resonant Raman spectroscopy
Source: Royal Society of Chemistry journal article supplement (doi:10.1039/c0nr00040j), 2010-01-01
Supplement: c0nr00040j.pdf [file c0nr00040j.pdf]

## **Supporting Information**

### **Nanoscale Heterogeneities in CeO<sub>2</sub>-ZrO<sub>2</sub> Nanocrystals Highlighted by**

### **UV-Resonance Raman Spectroscopy**

Takaaki Taniguchi, Tomoaki Watanebe, Satoshi Ichinohe, Kenichi

Katsumata, Masahiro Yoshimura, Kiyoshi Okada, and Nobuhiro

Matsushita

#### **S1. Experimental Section**

S1-1. Synthesis. A total amount of 3.5 mmol of (NH<sub>4</sub>)<sub>2</sub>Ce(NO<sub>3</sub>)<sub>6</sub> (Aldrich, 98.5%) and ZrOCl<sub>2</sub>·8H<sub>2</sub>O (Wako, 99.5%) in the molar ratio Zr/(Ce+Zr) = 0, 80, or 50%, was dissolved in distilled water (30 mL) at room temperature. Subsequently, we added ammonia (5 mL, 25 wt% aqueous solution, analytical grade, Wako) to the solution mixture. Then, the reaction mixture was placed in a polytetrafluoroethylene vessel (40 cm<sup>3</sup> inner volume). The vessel was sealed and placed inside a stainless steel autoclave, which remained at 200°C for 6 h under autogenous pressure. The products were collected by centrifugation (5000 rpm for 30 min), washed twice with distilled water, and then dried at 80°C for 6 h in air. Finally, we calcined the products at 800°C. The

treatment involved heating for 2 h up to the final temperature and isothermal annealing for 5 h.

S1-2. Characterizations. We characterized the crystalline products by XRD spectroscopy with a Rigaku RINT 2000 diffractometer with Ni-filtered Cu-K $\alpha$  radiation ( $\lambda = 1.54178$  Å). The average crystallite sizes were calculated with the Debye–Scherrer formula using the line broadening of a (220) reflection of the cubic phase. Visible- and UV-Raman spectroscopy were carried out on a Jobin–Yvon T64000 spectrometer (resolution of 1 cm) using a visible laser ( $\lambda = 514.5$  nm) and UV laser ( $\lambda = 363.8$  nm) with a laser power output of 50 mW at room temperature. The scattered light was collected with backscattering geometry using a liquid nitrogen cooled charge-coupled device (CCD) detector. The measurement system for UV-Raman spectra, which was designed by our research group, is described in detail in Ref. 1. We performed UV-Vis diffuse-reflectance spectroscopy using a Perkin Elmer lambda 35 UV-Vis spectrometer to obtain the absorption spectra. Transmission electron microscopy (TEM) observation was performed using a Hitachi HF-2000 transmission electron microscope operating at 200 kV.

Ref. 1. Yashima, M.; Kakihana, M.; Shimidzu, R.; Fujimori, H.; Yoshimura, M., *Appl. Spectroscopy* **1997**, *51*, 1224.
